# Supplementary material for: W4IrC1−x: a new noncentrosymmetric superconductor with a cubic β-Mn type structure
Source: Royal Society of Chemistry journal article supplement (doi:10.1039/d1tc05675a), 2022-01-01
Supplement: d1tc05675a1.pdf [file d1tc05675a1.pdf]

Electronic Supporting Information

**W<sub>4</sub>IrC<sub>1-x</sub>: A new noncentrosymmetric superconductor with  
the cubic  $\beta$ -Mn type structure**

Qingqing Zhu<sup>a,b,c</sup>, Guorui Xiao<sup>a,b,d</sup>, Yanwei Cui<sup>a,b,d</sup>, Wuzhang Yang<sup>a,b,c</sup>, Siqi Wu<sup>d</sup>, Guanghan  
Cao<sup>d</sup> and Zhi Ren<sup>a\*</sup>

<sup>a</sup>School of Science, Westlake University, 18 Shilongshan Road, Hangzhou 310024, P. R. China. Email:  
renzhi@westlake.edu.cn.

<sup>b</sup>Institute of Natural Sciences, Westlake Institute for Advanced Study, 18 Shilongshan Road, Hangzhou 310024,  
P. R. China.

<sup>c</sup>Department of Physics, Fudan University, Shanghai 200433, P. R. China.

<sup>d</sup>Department of Physics, Zhejiang University, Hangzhou 310027, P. R. China.

### S1. Comparison between the XRD patterns of as-cast and annealed $W_4IrC$

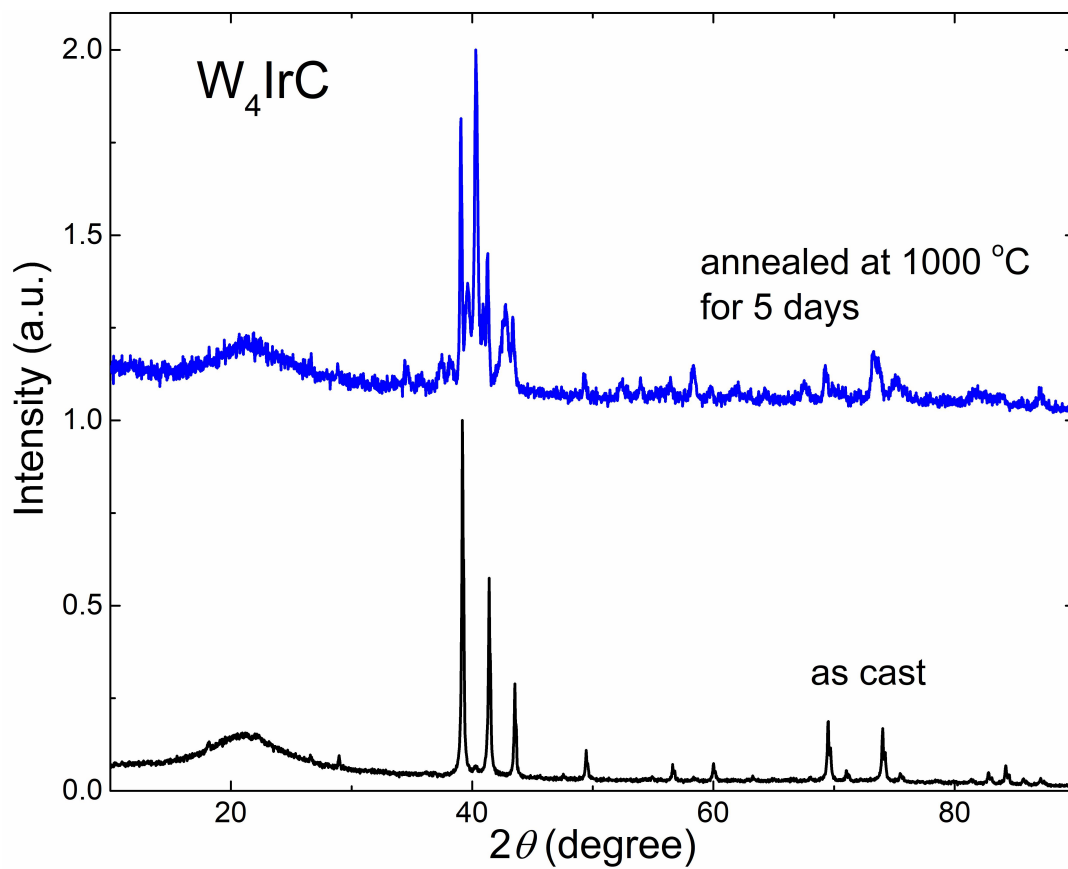

**Figure S1.** XRD pattern of as-cast and annealed  $W_4IrC$ . The annealing condition is 1000°C for 5 days.

**S2. EDX elemental mapping results for  $W_4IrC_{0.8}$**

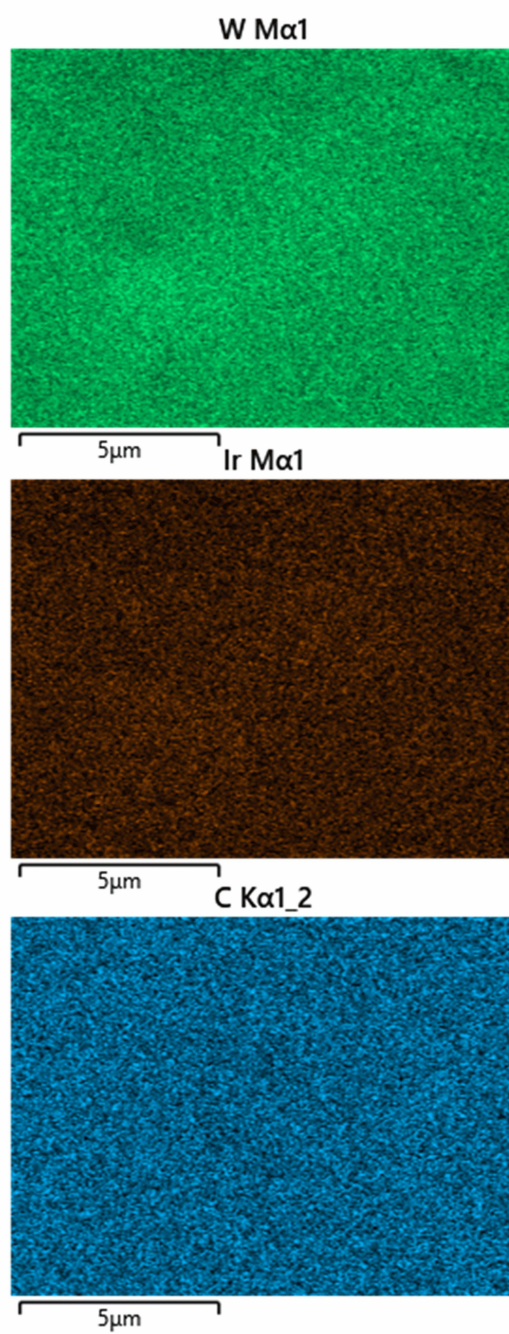

**Figure S2.** EDX elemental mapping results of W, Ir, and C for  $W_4IrC_{0.8}$ .
